# Supplementary material for: Multilocus Genetic Profile Reflecting Low Dopaminergic Signaling Is Directly Associated with Obesity and Cardiometabolic Disorders Due to Antipsychotic Treatment
Source: MDPI journal article supplement (doi:10.3390/pharmaceutics15082134), 2023-08-14
Supplement: s1 [file s1]

# Supplementary Materials: Multilocus Genetic Profile Reflecting Low Dopaminergic Signaling Is Directly Associated with Obesity and Cardiometabolic Disorders Due to Antipsychotic Treatment

Aurora Arrue, Olga Olivas, Leire Erkoreka, Francisco J. Alvarez, Ainara Arnaiz, Noemí Varela, Ainhoa Bilbao, J. J. Rodríguez, M Teresa Moreno-Calle, Estibaliz Gordo, Elena Marín, Javier García-Cano, Estela Saez, Miguel A. Gonzalez-Torres, Mercedes Zumárraga and Nieves Basterreche

**Table S1.** Description of primers, probes, and PCR conditions used for identifying polymorphisms in the studied genes.

| SNPs                                                              | PCR Components                                                                                                | C          | V final (μl) | Real-time PCR conditions                                                          |
|-------------------------------------------------------------------|---------------------------------------------------------------------------------------------------------------|------------|--------------|-----------------------------------------------------------------------------------|
| <i>DRD2</i> rs1799732<br><i>DRD2</i> rs6277<br><i>COMT</i> rs4680 | Primers and probes: Commercial kit TaqMan SNP Genotyping Assays, (Thermo Fisher Scientific, Waltham, MA, USA) | 20x        | 0.25         | 95°C 2 mins<br>95°C 5 sec and<br>60°C 10 sec for<br>36 cycles                     |
|                                                                   | Taq polymerase Sso Advanced (BioRad, Hercules, CA, USA)                                                       | 1x         | 2.5          |                                                                                   |
|                                                                   | Water                                                                                                         |            | 2.25         |                                                                                   |
|                                                                   | DNA template                                                                                                  |            | 0.5          |                                                                                   |
|                                                                   |                                                                                                               |            |              |                                                                                   |
| <i>DAT1</i> -VNTR (40pb)                                          | Primers: F:5'-AGGTCAGGCTACTGCCACTC-3'                                                                         | 3 μM       | 1.5          | 95°C 2 mins<br>95°C 20 sec,<br>62°C 10 sec and<br>72°C 10 sec for<br>30 cycles    |
|                                                                   | R:5'-CCGGCAGAGTGTTCTGCTG-3'                                                                                   | 3 μM       | 1.5          |                                                                                   |
|                                                                   | dNTPs: 4 X 10 mM                                                                                              | 4 x 0.2 mM | 0.5          |                                                                                   |
|                                                                   | Taq polymerase Kapa 2G Robust                                                                                 | 1 unit     | 0.2          |                                                                                   |
|                                                                   | CG buffer (Kapa Biosystems, Wilmington, MA, USA)                                                              | 1X         | 5            |                                                                                   |
|                                                                   | Water                                                                                                         |            | 15.3         |                                                                                   |
|                                                                   | DNA template                                                                                                  |            | 1            |                                                                                   |
| <i>DRD4</i> -VNTR (48 pb)                                         | Primers: F: 5'-GCGACTACGTGGTCTACTCG-3'                                                                        | 3 μM       | 1.5          | 95°C 3 minutes<br>95°C 20 sec,<br>62°C 10 sec and<br>72°C 10 sec for<br>30 cycles |
|                                                                   | R: 5'-AGGACCCTCATG GCCTTG-3'                                                                                  | 3 μM       | 1.5          |                                                                                   |
|                                                                   | dNTPs: 4 X 10 mM                                                                                              | 4 x 0.2 mM | 0.5          |                                                                                   |
|                                                                   | Taq polymerase Kapa 2G Robust                                                                                 | 1 unit     | 0.2          |                                                                                   |
|                                                                   | CG template (Kapa Biosystems, Wilmington, MA, USA)                                                            | 1X         | 5            |                                                                                   |
|                                                                   | Water                                                                                                         |            | 15.3         |                                                                                   |
|                                                                   | DNA template                                                                                                  |            | 1            |                                                                                   |

SNP: single-nucleotide polymorphism, *DRD2*: dopamine receptor type 2, *COMT*: Catechol O-methyltransferase, VNTR: variable number of tandem repeats polymorphism, *DAT1*: DA transporter, *DRD4*: Dopamine receptor type 4, C: Concentration, V: Volume.

**Table S2.** Position and genotypes frequency of the selected polymorphisms.

| Gen                                        | Polymorphism                            | C <sup>1</sup> | Region | Position                      | Genotype            | n   | %    |
|--------------------------------------------|-----------------------------------------|----------------|--------|-------------------------------|---------------------|-----|------|
| <b>DRD2</b>                                | rs1799732/<br>-141C InsDel <sup>2</sup> | 11             | 5'     | NG_008841.1:g.4750dup ->C     | InsIns              | 243 | 85.3 |
|                                            |                                         |                |        |                               | InsDel              | 42  | 14.7 |
|                                            |                                         |                |        |                               | DelDel              | 0   |      |
|                                            | rs6277                                  | 11             | Exon 7 | NG_008841.1:g.67543 C>T       | TT                  | 96  | 33.7 |
|                                            |                                         |                |        |                               | CT                  | 144 | 50.5 |
|                                            |                                         |                |        |                               | CC                  | 45  | 15.8 |
|                                            | rs4680/<br>Val158Met                    | 22             | Exon 3 | NG_011526.1:g.27009G>A        | GG                  | 79  | 27.7 |
|                                            |                                         |                |        |                               | AG                  | 147 | 51.6 |
|                                            |                                         |                |        |                               | AA                  | 59  | 20.7 |
|                                            |                                         |                |        |                               |                     |     |      |
| <b>DAT1<sup>3</sup></b><br><b>(SLC6A3)</b> | DAT1-VNTR                               | 5              | 3'-UTR | NC_000005.10(1392794-1445440) | 9R9R                | 36  | 12.6 |
|                                            |                                         |                |        |                               | 9R10R               | 124 | 43.5 |
|                                            |                                         |                |        |                               | 10R10R              | 125 | 43.9 |
| <b>DRD4<sup>4</sup></b>                    | DRD4-VNTR                               | 11             | Exon 3 | NC_000011.10(637269-640706)   | DRD4-S <sup>5</sup> | 176 | 61.8 |
|                                            |                                         |                |        |                               | DRD4-L <sup>6</sup> | 109 | 38.2 |

<sup>1</sup> C: Chromosome. <sup>2</sup> No individual was a carrier of the DelDel genotype of DRD2rs179932 (-141C InsDel). In bold, the allele with the lowest frequency in the Iberian population. <sup>3</sup> 40 base pairs can be present in 3 to 11 repeats (3R-11R), being the 9 or 10 repeats the most common in European population. <sup>4</sup> 48 base pairs can be presents in 2 to 11 repeats (2R-11R), being the 2R, 4R and 7R alleles the most common in European population. <sup>5</sup> DRD4-S: genotypes formed by two alleles < 7R. <sup>6</sup> DRD4-L: genotypes formed by one or two alleles ≥ 7R.

**Table S3.** Statistical power  $\chi^2$  and mean comparisons.

|                                 |               | BMI         | W           | SBP         | DBP         | TG          | HDL         | GLU         |
|---------------------------------|---------------|-------------|-------------|-------------|-------------|-------------|-------------|-------------|
| <b>DRD2</b><br><b>rs1799732</b> | $\chi^2$      | 8.122       | 1.199       | 0.440       | 1.044       | 1.254       | 1.052       | 0.898       |
|                                 | n             | 284         | 283         | 283         | 283         | 283         | 283         | 282         |
|                                 | df            | 1           | 1           | 1           | 1           | 1           | 1           | 1           |
|                                 | df*           | 1           | 1           | 1           | 1           | 1           | 1           | 1           |
|                                 | w             | 0.1691      | 0.0651      | 0.0394      | 0.0607      | 0.0666      | 0.0610      | 0.0564      |
|                                 | Power         | 0.8132      | 0.1946      | 0.1018      | 0.1755      | 0.2014      | 0.1765      | 0.1575      |
| <b>rs6277</b>                   | $\chi^2$      | 0.208       | 0.339       | 2.433       | 4.207       | 0.856       | 1.878       | 1.242       |
|                                 | n             | 284         | 283         | 283         | 283         | 283         | 283         | 282         |
|                                 | df            | 2           | 2           | 2           | 2           | 2           | 2           | 2           |
|                                 | df*           | 1           | 1           | 1           | 1           | 1           | 1           | 1           |
|                                 | w             | 0.0271      | 0.0346      | 0.0927      | 0.1219      | 0.0550      | 0.0815      | 0.0664      |
|                                 | Power         | 0.0660      | 0.0764      | 0.2671      | 0.4342      | 0.1201      | 0.2139      | 0.1545      |
| <b>COMT</b><br><b>rs4680</b>    | $\chi^2$      | 1.390       | 0.976       | 1.911       | 2.682       | 5.697       | 3.555       | 4.318       |
|                                 | n             | 284         | 283         | 283         | 283         | 283         | 283         | 282         |
|                                 | df            | 2           | 2           | 2           | 2           | 2           | 2           | 2           |
|                                 | df*           | 1           | 1           | 1           | 1           | 1           | 1           | 1           |
|                                 | w             | 0.0670      | 0.0587      | 0.0829      | 0.0973      | 0.1419      | 0.1121      | 0.1237      |
|                                 | Power         | 0.1682      | 0.1306      | 0.2171      | 0.2909      | 0.5606      | 0.3742      | 0.4443      |
| <b>DAT1-</b><br><b>VNTR</b>     | $\chi^2$      | 4.241       | 6.049       | 4.574       | 9.823       | 12.699      | 4.144       | 3.505       |
|                                 | n             | 284         | 283         | 283         | 283         | 283         | 283         | 282         |
|                                 | df            | 2           | 2           | 2           | 2           | 2           | 2           | 2           |
|                                 | df*           | 1           | 1           | 1           | 1           | 1           | 1           | 1           |
|                                 | w             | 0.1222      | 0.1462      | 0.1271      | 0.1863      | 0.2119      | 0.1209      | 0.1115      |
|                                 | Power         | 0.4373      | 0.5878      | 0.4669      | 0.8081      | 0.9012      | 0.4286      | 0.3694      |
| <b>DRD4-</b><br><b>VNTR</b>     | $\chi^2$      | 3.539       | 3.765       | 0.209       | 0.001       | 0.842       | 0           | 1.043       |
|                                 | n             | 284         | 283         | 283         | 283         | 283         | 283         | 282         |
|                                 | df            | 1           | 1           | 1           | 1           | 1           | 1           | 1           |
|                                 | df*           | 1           | 1           | 1           | 1           | 1           | 1           | 1           |
|                                 | w             | 0.1116      | 0.1153      | 0.0272      | 0.0017      | 0.0545      | 0           | 0.0608      |
|                                 | Power         | 0.4686      | 0.4923      | 0.0742      | 0.0501      | 0.1506      | 0.0501      | 0.1754      |
| <b>MLGP</b>                     | Mean 1 (SD 1) | 2.53 (0.91) | 2.46 (0.89) | 2.29 (0.87) | 2.42(0.89)  | 2.42 (0.87) | 2.36 (0.90) | 2.32 (0.86) |
|                                 | Mean 2 (SD 2) | 2.21 (0.84) | 2.18 (0.87) | 2.32 (0.91) | 2.13 (0.84) | 2.13 (0.86) | 2.25 (0.86) | 2.27 (0.92) |
|                                 | n 1*/n 2*     | 68/173      | 105/136     | 151/89      | 140/100     | 139/102     | 111/129     | 171/69      |
|                                 | d             | 0.3632      | 0.2847      | 0.0365      | 0.3399      | 0.3352      | 0.1317      | 0.0555      |
|                                 | Power         | 0.7147      | 0.5883      | 0.0585      | 0.7341      | 0.7261      | 0.1733      | 0.0673      |

\* 15% lower since the test used is actually the Mann-Whitney U test.  $w = \sqrt{\frac{\chi^2}{n \cdot df^*}}$ ;

$$df^* = \min(c - 1, r, 1); d = \frac{\bar{X}_1 - \bar{X}_2}{\sqrt{\frac{SD_1^2 + SD_2^2}{2}}}$$

Table S4. Statistical power regression models.

| Dependent variable | Regression logistic model                | p-value | Predictor variable | N   | Nag R <sup>2</sup> | Power  |
|--------------------|------------------------------------------|---------|--------------------|-----|--------------------|--------|
| BMI                | <i>DRD2</i> rs1799732 + illness duration | 0.05    | 2                  | 266 | 0.0837             | 0.9955 |
|                    | <i>DAT1</i> -VNTR + illness duration     | 0.05    | 2                  | 266 | 0.0667             | 0.9802 |
|                    | MLGP + illness duration                  | 0.05    | 2                  | 266 | 0.0759             | 0.9909 |
| W                  | <i>DAT1</i> -VNTR + sex                  | 0.05    | 2                  | 283 | 0.1008             | 0.9995 |
|                    | <i>DRD4</i> -VNTR +sex                   | 0.05    | 2                  | 283 | 0.0954             | 0.9991 |
|                    | MLGP + sex                               | 0.05    | 2                  | 283 | 0.0994             | 0.9994 |
| DBP                | <i>DAT1</i> -VNTR + age                  | 0.05    | 2                  | 265 | 0.0752             | 0.9901 |
|                    | MLGP + age                               | 0.05    | 2                  | 282 | 0.0660             | 0.9845 |
| TG                 | <i>DAT1</i> -VNTR + onset                | 0.05    | 2                  | 265 | 0.0989             | 0.9989 |
|                    | MLGP + onset                             | 0.05    | 2                  | 265 | 0.0632             | 0.9732 |

BMI: Body Mass Index, *DRD2*: dopamine receptor type 2, *DAT1*: DA transporter, VNTR: variable number of tandem repeats polymorphism, MLGP: Multilocus Genetic Profile Score, W: waist circumference, *DRD4*: Dopamine receptor type 4, DBP: Diastolic blood pressure, TG: Triglycerides

**Table S5.** Clinical-demographic distribution of patients according to the presence of obesity, hypertension, dyslipemia and hyperglycemia. Association analysis.

|                         |                     | BMI (n=284) |       | W (n=284) |                  | SBP (n=283) |              | DBP (n=283) |       | TG (n=283) |              | HDL (n=283) |              | Glu (n=282) |              |
|-------------------------|---------------------|-------------|-------|-----------|------------------|-------------|--------------|-------------|-------|------------|--------------|-------------|--------------|-------------|--------------|
|                         |                     | n           | %     | n         | %                | n           | %            | n           | %     | n          | %            | n           | %            | n           | %            |
|                         |                     | 204         | 71.8  | 160       | 56.5             | 105         | 37.1         | 118         | 41.4  | 120        | 42.4         | 152         | 53.7         | 81          | 28.7         |
| Sex<br>(n=285)          | Woman (n=97)        | 72          | 75.0  | 69        | 71.9             | 32          | 33.3         | 43          | 44.8  | 37         | 38.9         | 55          | 57.9         | 35          | 36.5         |
|                         | Men (n=188)         | 132         | 70.2  | 91        | 48.7             | 73          | 39.5         | 75          | 40.1  | 83         | 43.6         | 97          | 51.6         | 46          | 24.9         |
|                         | $\chi^2, p$         | 0.72        | 0.396 | 13.9      | <b>&lt;0.001</b> | 0.66        | 0.418        | 0.40        | 0.529 | 0.70       | 0.478        | 0.77        | 0.380        | 3.70        | <b>0.054</b> |
| Tobacco<br>(n=284)      | No (n=94)           | 70          | 75.3  | 58        | 62.4             | 37          | 39.4         | 38          | 40.4  | 33         | 35.5         | 44          | 47.3         | 33          | 35.1         |
|                         | Yes (n=190)         | 134         | 70.5  | 102       | 54.0             | 67          | 35.6         | 79          | 42.0  | 86         | 45.5         | 108         | 57.1         | 48          | 25.7         |
|                         | $\chi^2, p$         | 0.48        | 0.487 | 1.47      | 0.226            | 0.23        | 0.631        | 0.02        | 0.898 | 2.18       | <b>0.141</b> | 2.04        | 0.153        | 2.27        | 0.131        |
| Alcohol<br>(n=283)      | No (n=238)          | 173         | 73.3  | 137       | 58.3             | 88          | 37.6         | 102         | 43.4  | 100        | 42.3         | 124         | 52.8         | 68          | 28.9         |
|                         | Occasional (n=45)   | 30          | 66.7  | 23        | 51.1             | 16          | 35.6         | 15          | 33.3  | 18         | 40.0         | 27          | 60.0         | 13          | 28.9         |
|                         | $\chi^2, p$         | 0.75        | 0.386 | 0.74      | 0.486            | 0.00        | 0.958        | 1.14        | 0.286 | 0.02       | 0.896        | 0.57        | 0.449        | 0.00        | 1.00         |
| Cannabis<br>(n=284)     | No (n=244)          | 175         | 72.0  | 140       | 57.9             | 91          | 37.6         | 104         | 43.0  | 102        | 42.0         | 128         | 53.1         | 70          | 31.8         |
|                         | Occasional (n=40)   | 29          | 72.5  | 20        | 50.0             | 13          | 32.5         | 13          | 32.5  | 17         | 43.6         | 24          | 60.0         | 11          | 10.3         |
|                         | $\chi^2, p$         | 0.00        | 1.00  | 0.57      | 0.450            | 0.20        | 0.658        | 1.15        | 0.784 | 0.00       | 0.988        | 0.74        | 0.391        | 0.00        | 1.00         |
| AP treatment<br>(n=284) | Monotherapy (n=169) | 118         | 69.8  | 91        | 54.4             | 54          | 32.3         | 64          | 38.3  | 65         | 38.9         | 84          | 50.3         | 53          | 31.7         |
|                         | Polytherapy (n=115) | 85          | 74.1  | 68        | 59.6             | 51          | 44.3         | 54          | 48.1  | 54         | 47.0         | 68          | 59.1         | 52          | 45.2         |
|                         | $\chi^2, p$         | 0.54        | 0.463 | 0.62      | 0.430            | 3.71        | <b>0.054</b> | 1.75        | 0.186 | 1.48       | 0.223        | 1.80        | 0.180        | 9.24        | <b>0.002</b> |
| Con. Treat.<br>(n=282)  | No (n=78)           | 61          | 77.2  | 44        | 57.1             | 31          | 40.8         | 31          | 40.8  | 29         | 37.2         | 36          | 46.2         | 22          | 28.6         |
|                         | Yes (n=205)         | 143         | 70.4  | 115       | 56.4             | 73          | 35.6         | 87          | 42.4  | 90         | 44.3         | 116         | 57.1         | 59          | 29.1         |
|                         | $\chi^2, p$         | 0.99        | 0.321 | 0.01      | 1.00             | 1.43        | 0.509        | 0.01        | 0.910 | 0.91       | 0.341        | 2.32        | <b>0.128</b> | 0.00        | 1.00         |

.../...

1

2

**Table S5 cont...**Clinical-demographic distribution of patients according to the presence of obesity, hypertension, dyslipemia and hyperglycemia. Association analysis.

|                      |             | BMI (n=284) |              | W (n=283) |              | SBP (n=283) |              | DBP (n=283) |              | TG (n=283) |              | HDL (n=283) |              | Glu (n=282) |              |
|----------------------|-------------|-------------|--------------|-----------|--------------|-------------|--------------|-------------|--------------|------------|--------------|-------------|--------------|-------------|--------------|
|                      |             | n           | mean±sd      | n         | mean±sd      | n           | mean±sd      | n           | mean±sd      | n          | mean±sd      | n           | mean±sd      | n           | mean±sd      |
| Age , y              | normal P.   | 80          | 45.0±12.0    | 123       | 42.6±11.2    | 177         | 42.4±10.0    | 164         | 42.4±10.6    | 163        | 43.1±11.0    | 131         | 43.7±11.6    | 201         | 42.6±10.6    |
|                      | altered P.  | 203         | 43.3±10.2    | 160       | 44.7±10.3    | 105         | 46.8±10.6    | 118         | 45.7±10.7    | 119        | 44.8±10.3    | 151         | 43.9±9.9     | 81          | 47.1±10.3    |
|                      | Stu.-t test |             | 0.263        |           | <b>0.101</b> |             | <b>0.002</b> |             | <b>0.012</b> |            | 0.200        |             | 0.894        |             | <b>0.001</b> |
| Onset, y             | normal P.   | 74          | 21.1±6.6     | 116       | 22.0±8.0     | 166         | 22.6±7.7     | 157         | 23.1±8.2     | 152        | 22.0±7.7     | 125         | 22.4±8.3     | 187         | 23.1±8.0     |
|                      | altered P.  | 192         | 23.8±8.5     | 149       | 23.8±8.1     | 99          | 23.6±8.7     | 108         | 22.9±11.2    | 113        | 24.5±8.5     | 140         | 23.7±8.0     | 77          | 23.0±8.0     |
|                      | M-W U       |             | <b>0.066</b> |           | <b>0.086</b> |             | 0.326        |             | 0.932        |            | <b>0.028</b> |             | <b>0.126</b> |             | 0.916        |
| Illness duration, y  | normal P.   | 74          | 23.7±11.5    | 116       | 20.5±10.9    | 166         | 19.5±10.3    | 157         | 19.3±10.7    | 152        | 21.0±11.1    | 125         | 21.1±11.5    | 187         | 19.4±11.0    |
|                      | altered P.  | 192         | 19.5±10.7    | 149       | 21.0±11.2    | 99          | 22.9±12.0    | 108         | 22.8±11.2    | 113        | 20.4±11.1    | 140         | 20.2±10.7    | 77          | 24.2±10.6    |
|                      | M-W U       |             | <b>0.008</b> |           | 0.769        |             | <b>0.038</b> |             | <b>0.013</b> |            | 0.765        |             | 0.615        |             | <b>0.001</b> |
| AP daily doses, mg   | normal P.   | 79          | 757.8±645.9  | 121       | 698.5±559.6  | 174         | 665.2±498.5  | 101         | 651.0±492.0  | 161        | 668.8±511.7  | 127         | 633.4±379.6  | 197         | 657.3±474.1  |
|                      | altered P.  | 201         | 634.8±333.2  | 158       | 649.8±336.5  | 105         | 685.1±343.3  | 118         | 702.3±374.0  | 118        | 671.1±342.3  | 152         | 700.0±496.0  | 81          | 706.1±375.8  |
|                      | M-W U       |             | 0.374        |           | 0.871        |             | 0.165        |             | <b>0.070</b> |            | 0.293        |             | 0.189        |             | 0.152        |
| AP Treatment time, m | normal P.   | 80          | 27.1±41.3    | 123       | 26.0±41.1    | 177         | 25.3±40.2    | 164         | 24.3±38.2    | 163        | 23.9±37.1    | 130         | 25.3±39.2    | 200         | 25.3±38.0    |
|                      | altered P.  | 203         | 28.2±41.7    | 159       | 30.0±42.0    | 105         | 31.8±43.0    | 118         | 32.5±45.2    | 119        | 32.3±44.9    | 152         | 29.3±42.0    | 81          | 33.3±47.1    |
|                      | M-W U       |             | 0.524        |           | <b>0.124</b> |             | <b>0.013</b> |             | <b>0.047</b> |            | <b>0.056</b> |             | 0.306        |             | 0.232        |

Data are presented as n: number of patients with altered values and %. BMI: Body Mass Index, W: Waist circumference, SBP: Systolic blood pressure, DBP: Diastolic blood pressure, TG: Triglycerides, HDL: High Density lipoproteins, Glu: Glucose, AP: antipsychotic, Con. treatment: concomitant treatment (euthymizers, antidepressants, anxiolytics), y: years, m: months, normal P: normal values parameter, altered P: altered values parameter, Stu.-t test: Student-t test, M-W U: Mann Whitney–U test, n=total number of patients with altered values for each parameter.

3

4

5

6

7

**Table S6.** Association analysis. Frequency distribution of the genotypes of the studied polymorphisms according to presence/absence of altered BMI, waist circumference, blood pressure and TG, HDL or glucose levels using WHO<sup>1</sup> or ATP-III<sup>2</sup> criteria in antipsychotic treatment patients.

|        |           |                    |     | BMI <sup>1</sup> |       | W <sup>2</sup> |       | SBP <sup>2</sup> |       | DBP <sup>2</sup> |       | TG <sup>2</sup> |       | HDL <sup>2</sup> |       | Glu <sup>2</sup> |       |
|--------|-----------|--------------------|-----|------------------|-------|----------------|-------|------------------|-------|------------------|-------|-----------------|-------|------------------|-------|------------------|-------|
|        |           |                    |     | No               | A     | No             | A     | No               | A     | No               | A     | No              | A     | No               | A     | No               | A     |
|        |           |                    |     | 178              | 105   | 178            | 105   | 178              | 105   | 178              | 105   | 178             | 105   | 161              | 152   | 201              | 81    |
| Gene   | SNP       | Genotype           | n   | n                | n     | n              | n     | n                | n     | n                | n     | n               | n     | n                | n     | n                | n     |
| DRD2   | rs1799732 | InsIns             | 243 | 60               | 182   | 101            | 140   | 156              | 87    | 137              | 104   | 135             | 104   | 108              | 133   | 168              | 72    |
|        |           | InsDel             | 42  | 20               | 22    | 22             | 20    | 24               | 18    | 28               | 14    | 28              | 14    | 23               | 19    | 33               | 9     |
|        |           | X <sup>2</sup> , p |     | 8.12             | 0.004 | 1.20           | 0.274 | 0.44             | 0.507 | 1.04             | 0.307 | 1.25            | 0.263 | 1.05             | 0.305 | 0.90             | 0.343 |
|        | rs6277    | TT                 | 96  | 26               | 70    | 39             | 56    | 60               | 36    | 48               | 48    | 51              | 43    | 48               | 46    | 67               | 26    |
|        |           | CT                 | 144 | 42               | 101   | 64             | 79    | 94               | 48    | 88               | 54    | 84              | 60    | 61               | 83    | 105              | 39    |
|        |           | CC                 | 45  | 12               | 33    | 20             | 25    | 24               | 21    | 29               | 16    | 28              | 17    | 22               | 23    | 29               | 16    |
|        |           | X <sup>2</sup> , p |     | 0.21             | 0.901 | 0.34           | 0.844 | 2.43             | 0.296 | 4.21             | 0.122 | 0.86            | 0.650 | 1.88             | 0.391 | 1.24             | 0.537 |
| COMT   | rs4680    | MetMet             | 59  | 13               | 46    | 25             | 34    | 32               | 26    | 35               | 23    | 30              | 29    | 26               | 33    | 37               | 22    |
|        |           | ValMet             | 149 | 44               | 103   | 60             | 85    | 94               | 52    | 90               | 56    | 94              | 52    | 75               | 71    | 104              | 43    |
|        |           | ValVal             | 79  | 23               | 55    | 38             | 41    | 52               | 27    | 40               | 39    | 39              | 39    | 30               | 48    | 60               | 16    |
|        |           | X <sup>2</sup> , p |     | 1.39             | 0.449 | 0.98           | 0.614 | 1.91             | 0.385 | 2.68             | 0.262 | 5.70            | 0.058 | 3.55             | 0.169 | 4.32             | 0.115 |
| DAT1   | VNTR      | 9R9R               | 36  | 5                | 30    | 9              | 27    | 17               | 19    | 13               | 23    | 11              | 25    | 11               | 25    | 21               | 15    |
|        |           | 9R10R              | 124 | 35               | 89    | 55             | 69    | 82               | 41    | 71               | 52    | 74              | 50    | 61               | 63    | 92               | 32    |
|        |           | 10R10R             | 125 | 40               | 85    | 59             | 64    | 79               | 45    | 81               | 43    | 78              | 45    | 59               | 64    | 88               | 34    |
|        |           | X <sup>2</sup> , p |     | 4.24             | 0.120 | 6.05           | 0.049 | 4.58             | 0.102 | 9.82             | 0.007 | 12.7            | 0.002 | 4.14             | 0.126 | 3.50             | 0.173 |
| DRD4-S |           | 2 allele           | 176 | 52               | 119   | 84             | 90    | 113              | 63    | 102              | 74    | 105             | 70    | 81               | 94    | 129              | 46    |
| DRD4-L |           | 1,2 allele         | 109 | 23               | 85    | 39             | 70    | 65               | 42    | 63               | 44    | 58              | 50    | 50               | 58    | 72               | 35    |
|        |           | X <sup>2</sup> , p |     | 3.54             | 0.060 | 3.76           | 0.052 | 0.21             | 0.648 | 0.001            | 0.977 | 1.08            | 0.298 | 0.00             | 0.999 | 1.04             | 0.307 |

BMI: Body Mass Index, W: Waist circumference, SBP: Systolic blood pressure, HDL: High Density lipoproteins, Glu: Glucose, SNP: Single-nucleotide polymorphism, VNTR: Variable number of tandem repeats polymorphism, DRD2: Dopamine receptor type 2, COMT: Catechol O-methyltransferase, DAT1: Dopamine transporter, DRD4: Dopamine receptor type 4, n: Number of patients in each group, No: Normal values, A: Altered values.
